# Supplementary material
Source: PubMed Central journal article supplement (PMC9218929)
Supplement: jamasurg-e222229-s002.pdf [file jamasurg-e222229-s002.pdf]

1 **Supplement 2**

2 **Statistical Analysis Plan (Original 19.2.2008)**

3 **Statistical Analysis Plan: amendment 10-year follow-up (all amendments**  
4 **shown in *italic*) 11.3.2019**

5 Saija Hurme, Biostatistician, MSc

6

7 A Randomized Multicenter Study: Laparoscopic Gastric Bypass vs. laparoscopic sleeve gastrectomy  
8 in the treatment of morbid obesity

9

10

11 Aim of the study

12

13 The aim of the study is to compare two different operative techniques regarding weight loss,  
14 resolution of comorbidities and complications. The primary endpoint is weight loss evaluated by  
15 %EWL (excessive weight loss, %). The secondary endpoints include resolution of associated  
16 comorbidities, improvement of QOL, mortality, and morbidity of the procedures.

17

18 *Amendment to study aims at 10-year follow-up*

19 *The additional aim of the 10-year long-term follow-up was to compare the prevalence / cumulative*  
20 *incidence of gastroesophageal reflux (GERD), esophagitis, and Barrett's esophagus assessed by an*  
21 *upper gastrointestinal endoscopy and histopathology, GERD symptoms using a validated*  
22 *questionnaire, and proton pump inhibitor use between LSG and LRYGB.*

23

24 Hypothesis and meaning of the study

25

26 The results of this current RCT study enable comparison on the long-term data between the current  
27 golden standard of laparoscopic gastric bypass and laparoscopic sleeve gastrectomy. The hypothesis  
28 of the study is that as sleeve can be considered less traumatic and easier and faster to perform  
29 compared to RYGB, it could become the procedure of choice in treating morbid obesity provided that  
30 long-term results of SG were comparable with those of RYGB. The results can directly be applied to  
31 patient care.

32

33

34 *Additional post hoc outcomes at 10 years*

35

36 *Endoscopic findings of esophagitis and Barrett's esophagus including histopathology, reflux*  
37 *symptoms using a validated questionnaire (GERD-Health Related Quality of Life Questionnaire,*  
38 *GERD-HRQL), and PPI use will be assessed at 10 years. If evaluated clinically necessary, patients*  
39 *may also undergo pH-monitoring and manometry studies. A validated questionnaire (AUDIT)*  
40 *assessing patient alcohol use will be used at long-term follow-up.*

41

42 Sample size calculation

43

44 Sample size calculations are based on test of mean difference of bypass and sleeve operation in  
45 excessive weight loss (EWL) in one year. The mean of 60 and standard deviation of 20 in bypass  
46 group were assumed and  $\alpha$ -level of 0.05 were used in calculations. By using an equivalence design  
47 with a margin of equivalence of 15% (-9 to 9), a sample size of 108 patients per group is needed for  
48 90% power. When 10% drop out is taken account, 120 patients per group were recruited for the  
49 study.

50

51 Statistical analyses

52

53 Continuous variables will be characterized by treatment and time-point using means and standard  
54 deviations (SD) or medians and range of values, and in case of categorical variables frequencies and  
55 percentages will be used.

56 Primary endpoint of the study is weight loss evaluated by %EWL (excess weight loss, %) and groups  
57 will be compared using equivalence trial setting. *For comparing the groups, the 95% confidence*  
58 *intervals (95% CI) for the difference between the study groups will be calculated at every time-point*  
59 *and the equivalence will be evaluated using the pre-defined margins of equivalence -9 to 9. Original*  
60 *plan at study initiation of using the 90% confidence interval was revised to 95% confidence interval*  
61 *based on the discussion in the peer review process of 5-year results of the study. When analyzing the*  
62 *data from the longer follow-up, repeated measurements ANOVA will be used (PROC MIXED in SAS)*  
63 *and confounding factors will be taken into account in the analyses, if needed. Excess weight at*  
64 *baseline, operation type, time (within factor) and the interaction of operation and time will be included*  
65 *in the model as well as diabetes status and study site as between factors and other potential*  
66 *covariates, if needed.*

67 In analyses of secondary outcomes associations between categorical variables will be tested using  
68 Pearson's  $\chi^2$  -test and in case of small frequencies Fisher's exact test will be used. Differences  
69 between groups in normally distributed continuous variables will be tested using independent samples  
70 t-test and in case of non-normally distributed variables Mann-Whitney U test will be used. When the  
71 data from the longer follow-up will be analyzed, repeated measurements ANOVA techniques will be  
72 used (PROC MIXED in SAS) to analyze continuous variables and confounding factors will be taken  
73 into account in the analyses if needed. *All of the models will include operation, time (within factor),*  
74 *interaction of operation and time, and study site as between factors. Models will also include other*  
75 *covariates as between factors, if needed. Results will be quantified using model-based mean*  
76 *estimates with 95% CI. The results will be presented separately for both operations and time points*  
77 *only, if the interaction term in the model is statistically significant. Otherwise, the estimates of the main*  
78 *effects of operation and time will be used. Transformation of the variables will be used when needed*  
79 *to achieve the normality of the residuals. Assumptions for models will be checked with the evaluation*

80 of studentized residuals. Step-down Bonferroni method of Holm will be used to adjust the p-values in  
81 pairwise comparisons.

82 Subgroup of patients with type 2 diabetes (T2DM) at baseline will also be analyzed separately  
83 regarding the variables related to weight. The effect of preoperative duration of T2DM on weight  
84 related variables and remission of diabetes will be evaluated.

85 Additional sub-group analyses will be performed for the data, if needed.

86

87 Two-tailed p-values will be used and p-values less than 0.05 will be considered statistically significant.  
88 The main analyses will be based on the intention-to-treat principle, i.e. all patients will be analyzed in  
89 their initial randomized intervention group. *For the primary outcome of %EWL, a per-protocol analysis*  
90 *will also be performed by excluding from the analysis all the patients, who have undergone a*  
91 *conversion to another bariatric procedure.* Missing data will be excluded from the analyses *but*  
92 *sensitivity analyses will be made for primary endpoint using multiple imputation. Multivariate*  
93 *imputation by fully conditional specification method will be performed. The predictive mean matching*  
94 *method will be used to construct 10 imputed datasets and a linear mixed model for repeated*  
95 *measures will be fitted for each. Results will be combined for the inference and compared to the*  
96 *original analyses.* Statistical analyses will be performed using SAS System for Windows, Version 9.2  
97 or later (SAS Institute Inc., Cary, NC).

98

99

100 SLEEVEPASS Statistical analysis plan:

101 Summary of clinical amendments (11.3.2019) at 10-year follow-up, please see above for the detailed  
102 statistical additions in *italic*

103

104 Amendment to study aims at 10-year follow-up

105 The additional aim of the 10-year long-term follow-up was to compare the prevalence / cumulative  
106 incidence of gastroesophageal reflux (GERD), esophagitis, and Barrett's esophagus assessed by an  
107 upper gastrointestinal endoscopy and histopathology, GERD symptoms using a validated  
108 questionnaire, and proton pump inhibitor use between LSG and LRYGB.

109

110 Additional post hoc outcomes at 10 years

111

112 Endoscopic findings of esophagitis and Barrett's esophagus including histopathology, reflux  
113 symptoms using a validated questionnaire (GERD-Health Related Quality of Life Questionnaire,  
114 GERD-HRQL), and PPI use will be assessed at 10 years. If evaluated clinically necessary, patients  
115 may also undergo pH-monitoring and manometry studies. A validated questionnaire (AUDIT)  
116 assessing patient alcohol use will be used at long-term follow-up.
