# Supplementary material
Source: PubMed Central journal article supplement (PMC9218929)
Supplement: jamasurg-e222229-s004.pdf [file jamasurg-e222229-s004.pdf]

## Data Sharing Statement

Salminen. Effect of Laparoscopic Sleeve Gastrectomy vs Roux-en-Y Gastric Bypass on Weight Loss, Comorbidities, and Reflux at 10 Years in Adult Patients With Obesity. *JAMA Surg*. Published June 22, 2022. doi:10.1001/jamasurg.2022.2229

### Data

**Data available:** No

### Additional Information

**Explanation for why data not available:** The data requests can be directed to the primary investigator and will be evaluated by the study group.
